# Supplementary material for: CD133 facilitates epithelial-mesenchymal transition through interaction with the ERK pathway in pancreatic cancer metastasis
Source: PubMed Central journal article supplement (PMC3931313; doi:10.1186/1476-4598-13-15), 2014-01-27

**Figure S1:** Examination of CD133 expression before and after shRNA-CD133 transduced into Capan1M9 cells.

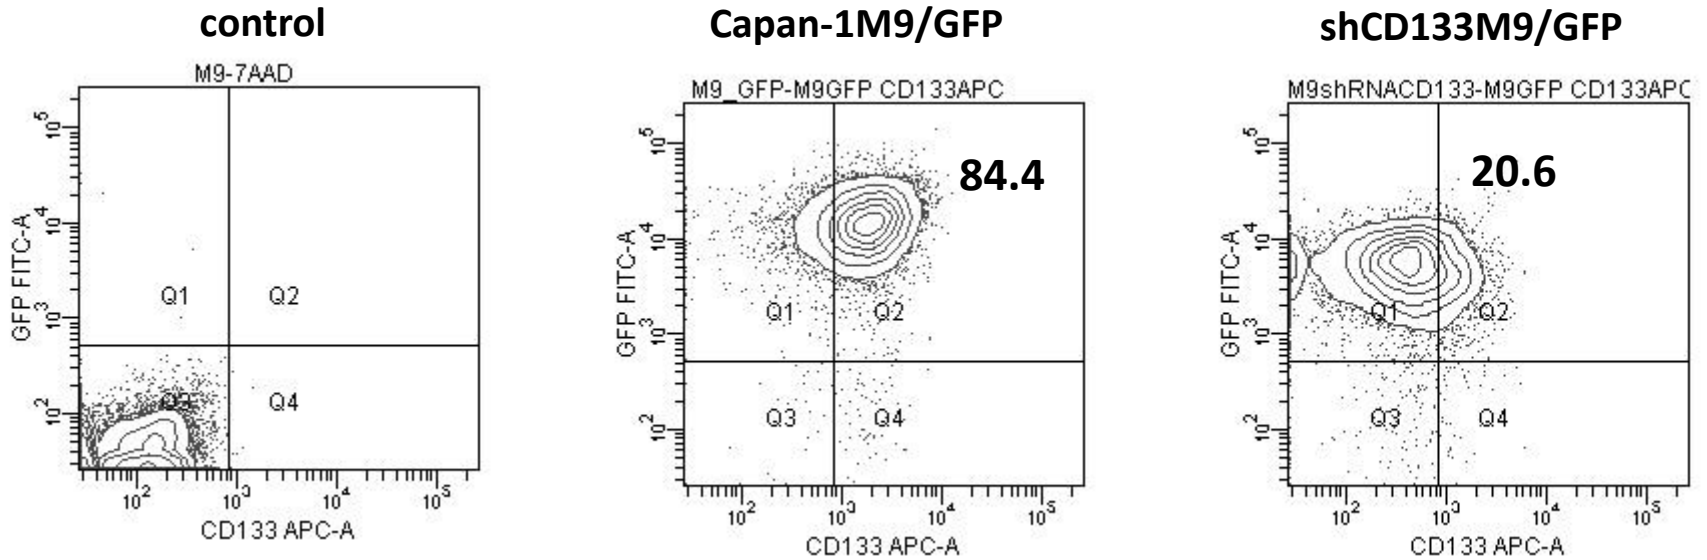

|                      | CD133/1-APC | CD133/1-PE  | GFP         |
|----------------------|-------------|-------------|-------------|
| <b>Capan-1M9</b>     | <b>89.0</b> | <b>72.6</b> | <b>0</b>    |
| <b>Capan-1M9/GFP</b> | <b>84.4</b> | <b>72.6</b> | <b>99.0</b> |
| <b>shCD133M9/GFP</b> | <b>20.6</b> | <b>-</b>    | <b>97.8</b> |

**Figure S2:** In vivo experimental schedule for analysis of invasion and metastasis by the metastatic or orthotopic models.

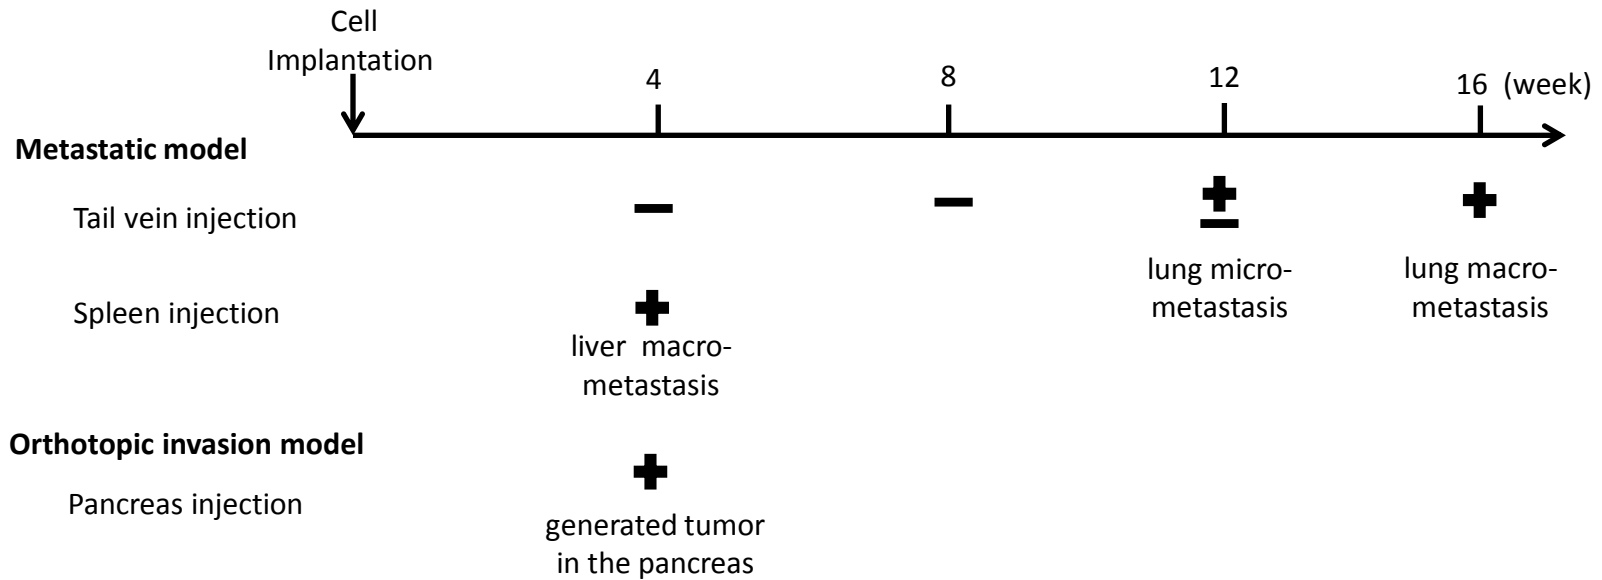

**Figure S3:** The lung metastasis model created by the tail vein injection of Capan1M9-GFP or shCD133M9-GFP cells into nude mice.

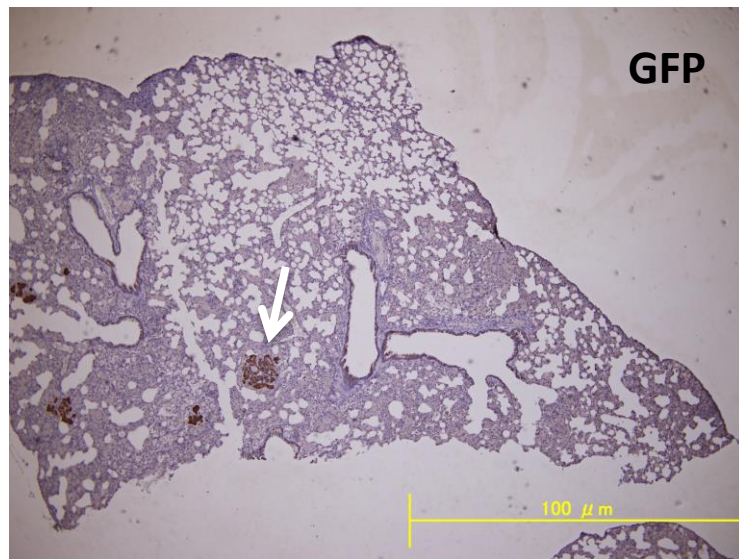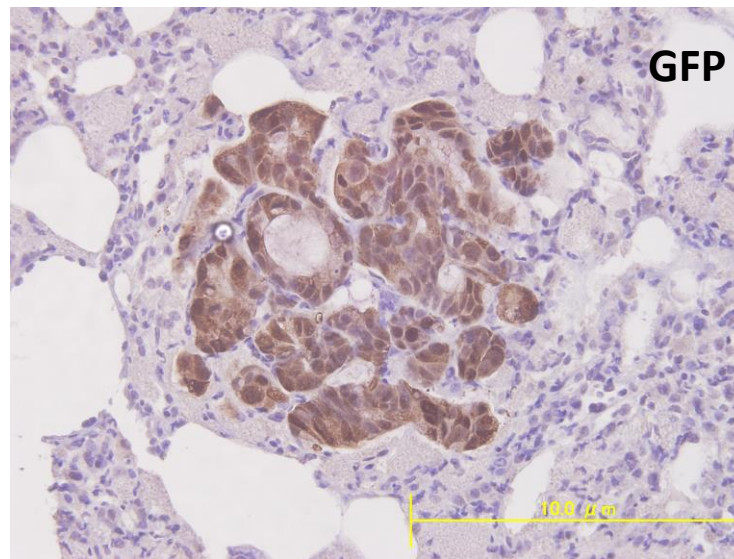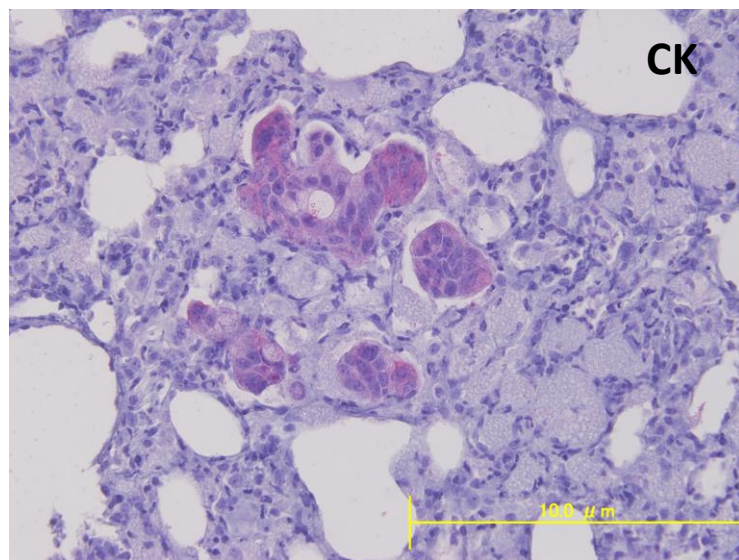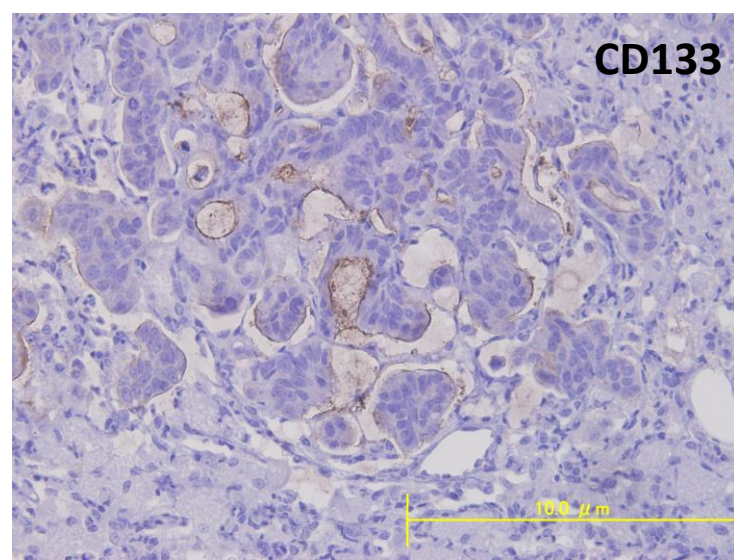

**Figure S4:** Comparison of tumor-take rates between CD133<sup>high</sup> and CD133<sup>KD</sup> cells by subcutaneous xenograft tumor model

**Nude mouse with tumors**

M9 shRNA-CD133  
1x10<sup>2</sup>cells

M9 1x10<sup>2</sup>cells

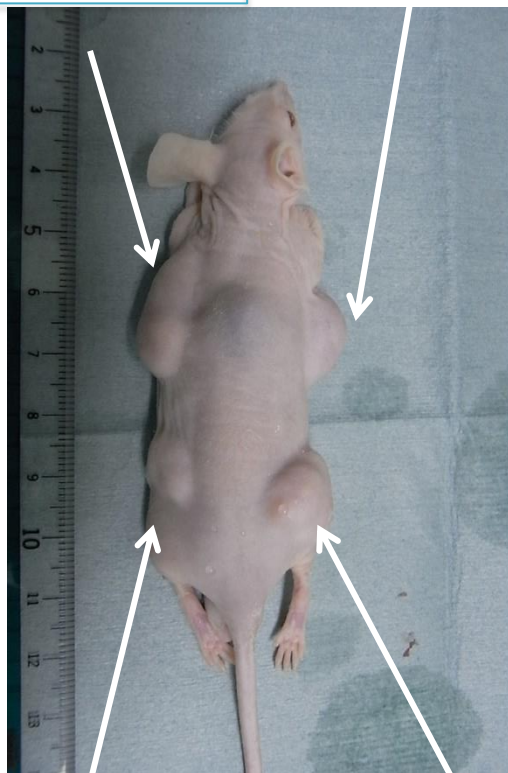

M9 shRNA-CD133  
1x10<sup>3</sup>cells

M9 1x10<sup>3</sup>cells

**Comparison of tumor-take rate in nude mice between Capan-1M9 and shCD133M9 cells**

| Number of cells (s.c.) | Capan-1M9 | shCD133M9 |
|------------------------|-----------|-----------|
| 100 cells              | 5/5       | 5/5       |
| 1000 cells             | 5/5       | 5/5       |

(n=5)

**Figure S5:** Comparison of growth curves among the tumors generated by CD133<sup>high</sup> and CD133<sup>KD</sup> cells in xenograft models

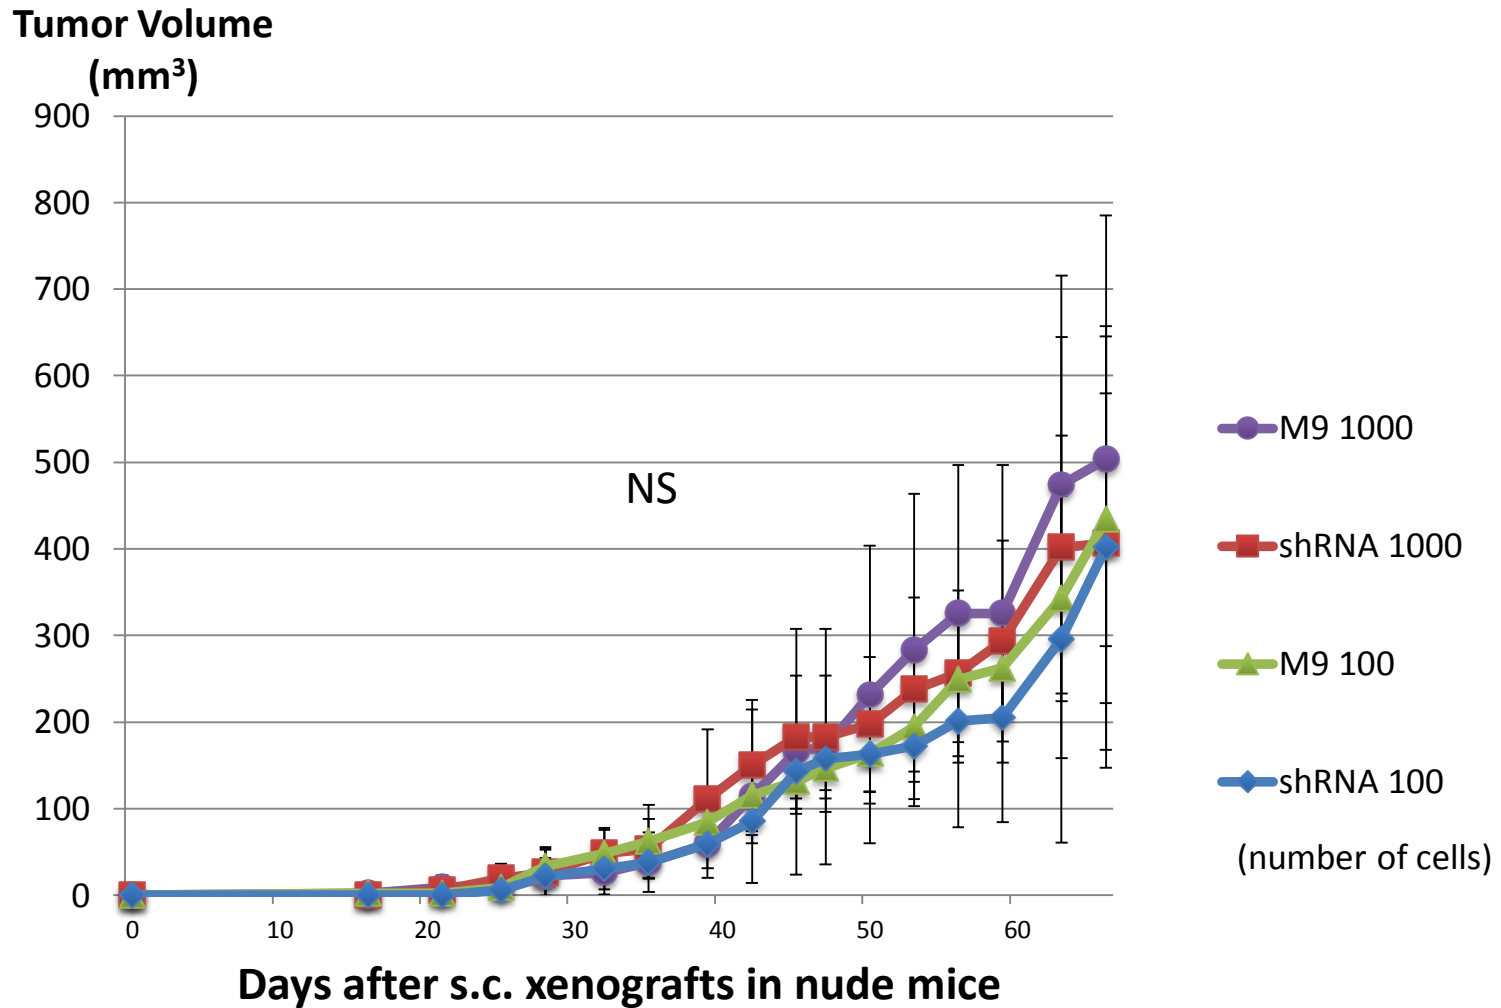

**Figure S6:** Comparison of four week's tumor volumes between tumors generated by CD133<sup>high</sup> and CD133<sup>KD</sup> cells in pancreatic orthotopic model.

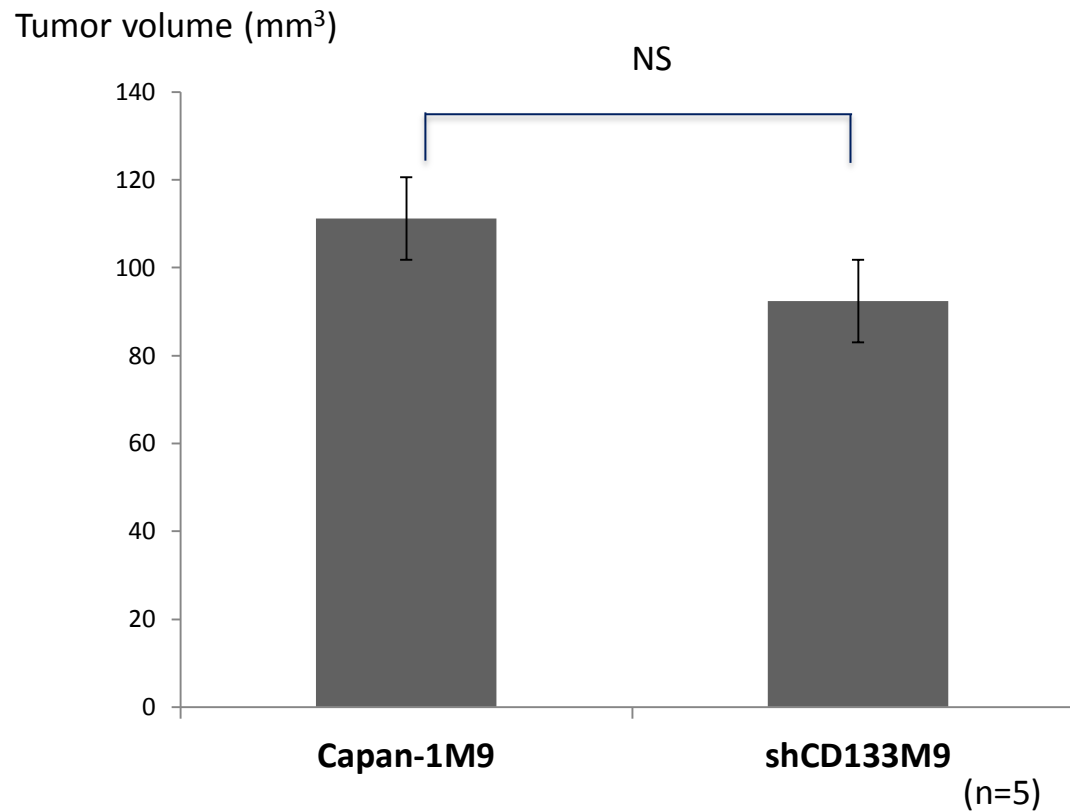



**Figure S7:** Transduction of shRNACD133 and shRNASlug into Capan1M9 cells. mRNA expression levels of CD133 and Slug were examined after shRNA transduction of CD133 or Slug into Capan1M9 cells (*left*). Fluorescent observation of GFP after shRNA transduction into Capan1M9 cells (*right*).

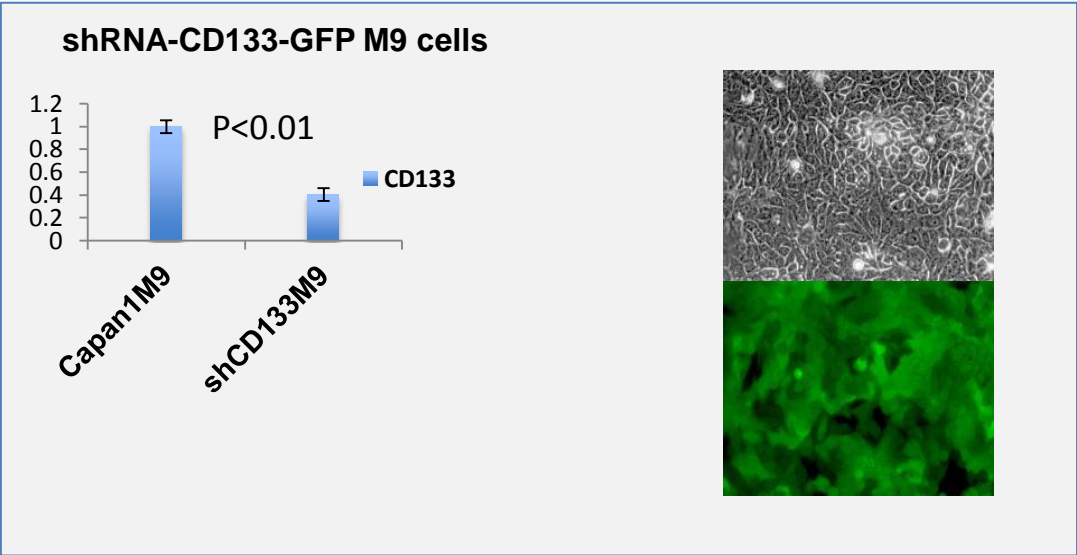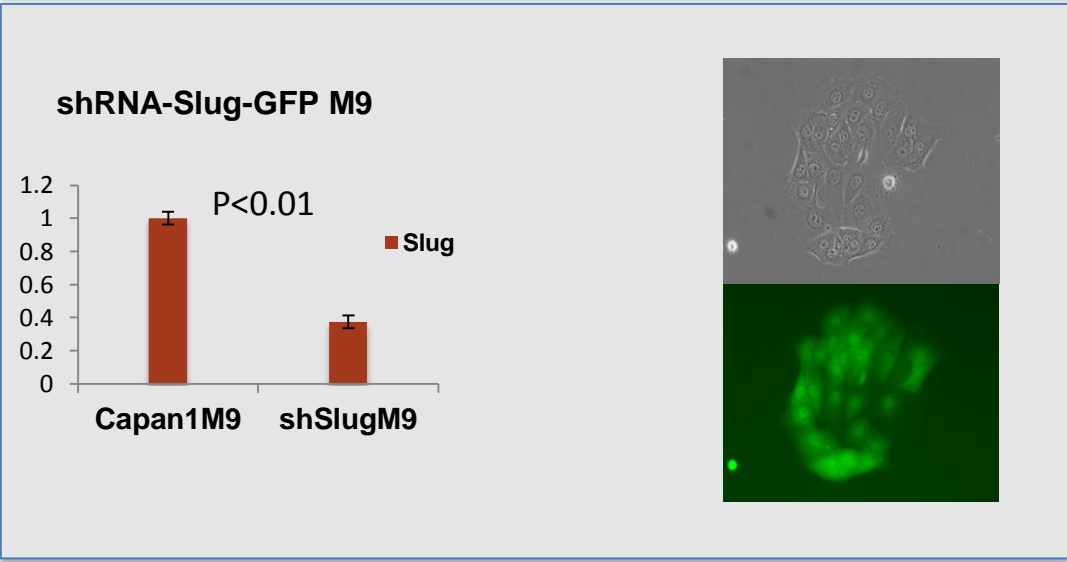

**Figure S8:** Validation of Slug expression after ERK or TGF inhibitor treatment. Slug mRNA expression was examined after ERK or TGF inhibitor (U0126 or SB431542) treatment.

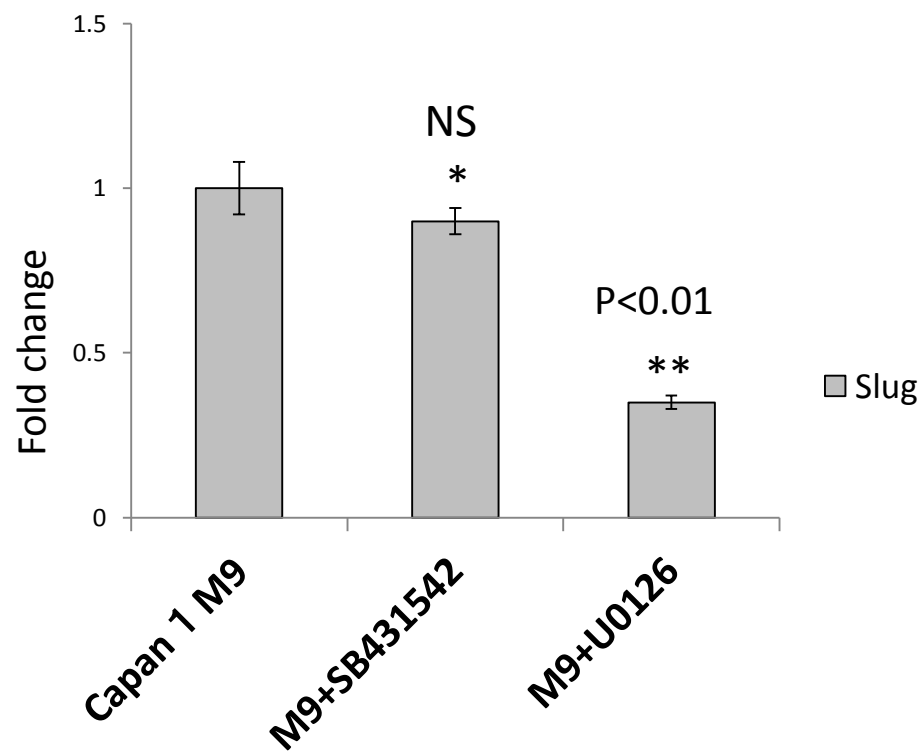

Supplement: 1476-4598-13-15-S1.pdf [file 1476-4598-13-15-S1.pdf]
