# Supplementary material for: CD133 facilitates epithelial-mesenchymal transition through interaction with the ERK pathway in pancreatic cancer metastasis
Source: PubMed Central journal article supplement (PMC3931313; doi:10.1186/1476-4598-13-15), 2014-01-27
Supplement: 1476-4598-13-15-S2.pdf [file 1476-4598-13-15-S2.pdf]

Table S1

| GeneSymbol | Description                                                                                                                                                   | Signal      |             | ratio       |
|------------|---------------------------------------------------------------------------------------------------------------------------------------------------------------|-------------|-------------|-------------|
|            |                                                                                                                                                               | M9          | shGD133M9   |             |
| VIM        | Homo sapiens vimentin (VIM), mRNA [NM_003380]                                                                                                                 | 269.405575  | 14.5888225  | 0.054151895 |
| SNAI2      | Homo sapiens snail homolog 2 (Drosophila) (SNAI2), mRNA [NM_003068]                                                                                           | 56.742035   | 7.067408625 | 0.124553316 |
| FN1        | Homo sapiens fibronectin 1 (FN1), transcript variant 7, mRNA [NM_054034]                                                                                      | 23.34250625 | 3.9644705   | 0.169839111 |
| IL1RN      | Homo sapiens interleukin 1 receptor antagonist (IL1RN), transcript variant 4, mRNA [NM_173843]                                                                | 15554.5     | 4020.711    | 0.258491819 |
| FOXC2      | Homo sapiens forkhead box C2 (MFH-1, mesenchyme forkhead 1) (FOXC2), mRNA [NM_005251]                                                                         | 23.70205    | 6.620899    | 0.279338665 |
| MITF       | Homo sapiens microphthalmia-associated transcription factor (MITF), transcript variant 1, mRNA [NM_198159]                                                    | 1677.09075  | 554.6804375 | 0.330739668 |
| NOTCH1     | Homo sapiens notch 1 (NOTCH1), mRNA [NM_017617]                                                                                                               | 675.14325   | 247.6606125 | 0.366826762 |
| CDH2       | Homo sapiens cadherin 2, type 1, N-cadherin (neuronal) (CDH2), mRNA [NM_001792]                                                                               | 695.0580281 | 257.1971135 | 0.370036894 |
| FZD7       | Homo sapiens frizzled family receptor 7 (FZD7), mRNA [NM_003507]                                                                                              | 817.834408  | 320.1853875 | 0.391503933 |
| ITGAV      | Homo sapiens integrin, alpha V (vitronectin receptor, alpha polypeptide, antigen CD51) (ITGAV), transcript variant 1, mRNA [NM_002210]                        | 10146.99361 | 4141.590421 | 0.40815936  |
| MMP9       | Homo sapiens matrix metalloproteinase 9 (gelatinase B, 92kDa gelatinase, 92kDa type IV collagenase) (MMP9), mRNA [NM_004994]                                  | 181.6547384 | 75.3131224  | 0.414594869 |
| TGFB2      | Homo sapiens transforming growth factor, beta 2 (TGFB2), transcript variant 2, mRNA [NM_003238]                                                               | 654.2277412 | 283.6823875 | 0.433614122 |
| KRT14      | Homo sapiens keratin 14 (KRT14), mRNA [NM_000526]                                                                                                             | 723.035525  | 327.4258219 | 0.452848872 |
| STEAP1     | Homo sapiens six transmembrane epithelial antigen of the prostate 1 (STEAP1), mRNA [NM_012449]                                                                | 2937.4265   | 1382.112792 | 0.470518255 |
| TMEM132A   | Homo sapiens transmembrane protein 132A (TMEM132A), transcript variant 1, mRNA [NM_017870]                                                                    | 11660.30125 | 6088.394125 | 0.522147241 |
| KRT7       | Homo sapiens keratin 7 (KRT7), mRNA [NM_005556]                                                                                                               | 205747.9875 | 108527.3875 | 0.527477274 |
| PTK2       | Homo sapiens PTK2 protein tyrosine kinase 2 (PTK2), transcript variant 1, mRNA [NM_153831]                                                                    | 848.3526125 | 502.7078875 | 0.592569505 |
| TSPAN13    | Homo sapiens tetraspanin 13 (TSPAN13), mRNA [NM_014399]                                                                                                       | 2238.7915   | 1407.64225  | 0.628750935 |
| ZEB1       | Homo sapiens zinc finger E-box binding homeobox 1 (ZEB1), transcript variant 1, mRNA [NM_001128128]                                                           | 26.05846125 | 16.5438525  | 0.634874498 |
| GNGB1      | Homo sapiens guanine nucleotide binding protein (G protein), gamma 11 (GNGB1), mRNA [NM_004126]                                                               | 202.7561704 | 139.2596253 | 0.686832983 |
| ITGB1      | Homo sapiens integrin, beta 1 (fibronectin receptor, beta polypeptide, antigen CD29 includes MDF2, MSK12) (ITGB1), transcript variant 1E, mRNA [NM_133376]    | 1941.083113 | 1362.83509  | 0.702100328 |
| CAMK2N1    | Homo sapiens calcium/calmodulin-dependent protein kinase II inhibitor 1 (CAMK2N1), mRNA [NM_018584]                                                           | 5600.74683  | 4019.404653 | 0.717655123 |
| EGFR       | Homo sapiens epidermal growth factor receptor (EGFR), transcript variant 1, mRNA [NM_005228]                                                                  | 289.3324763 | 219.9080181 | 0.760053005 |
| COL5A2     | Homo sapiens collagen, type V, alpha 2 (COL5A2), mRNA [NM_000393]                                                                                             | 115.58975   | 87.9014825  | 0.760460876 |
| PLEK2      | Homo sapiens pleckstrin 2 (PLEK2), mRNA [NM_016445]                                                                                                           | 5031.790125 | 3903.478625 | 0.775763402 |
| ITGA5      | Homo sapiens integrin, alpha 5 (fibronectin receptor, alpha polypeptide) (ITGA5), mRNA [NM_002205]                                                            | 174.6968625 | 136.31525   | 0.780295926 |
| ILK        | Homo sapiens integrin-linked kinase (ILK), transcript variant 3, mRNA [NM_001014795]                                                                          | 2126.26939  | 1718.618748 | 0.80827893  |
| SNAI1      | Homo sapiens snail homolog 1 (Drosophila) (SNAI1), mRNA [NM_005985]                                                                                           | 128.0035525 | 104.0177297 | 0.81261596  |
| MSN        | Homo sapiens moesin (MSN), mRNA [NM_002444]                                                                                                                   | 536.432725  | 479.7053125 | 0.894250649 |
| F11R       | Homo sapiens F11 receptor (F11R), mRNA [NM_016946]                                                                                                            | 28024.39125 | 26077.105   | 0.930514592 |
| CAV2       | Homo sapiens caveolin 2 (CAV2), transcript variant 1, mRNA [NM_001233]                                                                                        | 607.0546613 | 605.8412483 | 0.998001147 |
| CDH1       | Homo sapiens cadherin 1, type 1, E-cadherin (epithelial) (CDH1), mRNA [NM_004360]                                                                             | 9811.239324 | 10611.02271 | 1.08151706  |
| TGFB1      | Homo sapiens transforming growth factor, beta 1 (TGFB1), mRNA [NM_000660]                                                                                     | 820.4119617 | 897.561245  | 1.094037248 |
| SERPINE1   | Homo sapiens serpin peptidase inhibitor, clade E (nexin, plasminogen activator inhibitor type 1), member 1 (SERPINE1), transcript variant 1, mRNA [NM_000602] | 13.14648905 | 15.30358359 | 1.164081416 |
| TIMP1      | Homo sapiens TIMP metalloproteinase inhibitor 1 (TIMP1), mRNA [NM_003254]                                                                                     | 3068.434625 | 3628.826375 | 1.182631152 |
| SNAI3      | Homo sapiens snail homolog 3 (Drosophila) (SNAI3), mRNA [NM_178310]                                                                                           | 86.723435   | 104.0595921 | 1.199901643 |
| ESR1       | Homo sapiens estrogen receptor 1 (ESR1), transcript variant 1, mRNA [NM_000125]                                                                               | 28.5033525  | 40.367195   | 1.416226214 |
| OCLN       | Homo sapiens occludin (OCLN), transcript variant 1, mRNA [NM_002538]                                                                                          | 432.1801625 | 643.668125  | 1.489351388 |
| IGFBP4     | Homo sapiens insulin-like growth factor binding protein 4 (IGFBP4), mRNA [NM_001552]                                                                          | 446.6832875 | 706.3216625 | 1.581258315 |
| FGFBP1     | Homo sapiens fibroblast growth factor binding protein 1 (FGFBP1), mRNA [NM_005130]                                                                            | 2031.222625 | 3695.347    | 1.819272272 |
| ERBB3      | Homo sapiens v-erb-b2 erythroblastic leukemia viral oncogene homolog 3 (avian) (ERBB3), transcript variant 1, mRNA [NM_001982]                                | 3384.575438 | 6670.921    | 1.970977194 |
| DSP        | Homo sapiens desmoplakin (DSP), transcript variant 1, mRNA [NM_004415]                                                                                        | 3972.784375 | 9276.67825  | 2.335057072 |
| JAG1       | Homo sapiens jagged 1 (JAG1), mRNA [NM_000214]                                                                                                                | 76.85549875 | 206.2662629 | 2.683819197 |
| CALD1      | Homo sapiens caldesmon 1 (CALD1), transcript variant 1, mRNA [NM_033138]                                                                                      | 146.2501125 | 527.5935875 | 3.607474746 |
| DSC2       | Homo sapiens desmocollin 2 (DSC2), transcript variant Dsc2a, mRNA [NM_024422]                                                                                 | 147.7242    | 724.674875  | 4.905593498 |
| RGS2       | Homo sapiens regulator of G-protein signaling 2, 24kDa (RGS2), mRNA [NM_002923]                                                                               | 308.1948151 | 1625.207484 | 5.273312218 |
| BMP7       | Homo sapiens bone morphogenetic protein 7 (BMP7), mRNA [NM_001719]                                                                                            | 4.928789875 | 26.6732825  | 5.411730501 |
| WNT11      | Homo sapiens wingless-type MMTV integration site family, member 11 (WNT11), mRNA [NM_004626]                                                                  | 71.56063    | 396.12025   | 5.53544945  |
| TCF4       | Homo sapiens transcription factor 4 (TCF4), transcript variant 2, mRNA [NM_003199]                                                                            | 34.24982982 | 192.5447125 | 5.621771364 |
| PDGFRB     | Homo sapiens platelet-derived growth factor receptor, beta polypeptide (PDGFRB), mRNA [NM_002609]                                                             | 3.724214625 | 35.3407475  | 9.489449739 |

Table S2

| GeneSymbol | Description                                                                                                                            | Signal      |             | ratio       | Zscore       |
|------------|----------------------------------------------------------------------------------------------------------------------------------------|-------------|-------------|-------------|--------------|
|            |                                                                                                                                        | M9          | shCD133M9   |             |              |
| VIM        | Homo sapiens vimentin (VIM), mRNA [NM_003380]                                                                                          | 269.405575  | 14.5888225  | 0.054151895 | -3.250428181 |
| SNAI2      | Homo sapiens snail homolog 2 (Drosophila) (SNAI2), mRNA [NM_003068]                                                                    | 56.742035   | 7.067408625 | 0.124553316 | -2.024294618 |
| IL1RN      | Homo sapiens interleukin 1 receptor antagonist (IL1RN), transcript variant 4, mRNA [NM_173843]                                         | 15554.5     | 4020.711    | 0.258491819 | -3.872556323 |
| MITF       | Homo sapiens microphthalmia-associated transcription factor (MITF), transcript variant 1, mRNA [NM_198159]                             | 1677.09075  | 554.6804375 | 0.330739668 | -2.429942151 |
| NOTCH1     | Homo sapiens notch 1 (NOTCH1), mRNA [NM_017617]                                                                                        | 675.14325   | 247.6606125 | 0.366826762 | -2.201136756 |
| CDH2       | Homo sapiens cadherin 2, type 1, N-cadherin (neuronal) (CDH2), mRNA [NM_001792]                                                        | 695.0580281 | 257.1971135 | 0.370036894 | -2.181885883 |
| FZD7       | Homo sapiens frizzled family receptor 7 (FZD7), mRNA [NM_003507]                                                                       | 817.834408  | 320.1853875 | 0.391503933 | -2.057289317 |
| ITGAV      | Homo sapiens integrin, alpha V (vitronectin receptor, alpha polypeptide, antigen CD51) (ITGAV), transcript variant 1, mRNA [NM_002210] | 10146.99361 | 4141.590421 | 0.40815936  | -2.098302212 |
| KRT7       | Homo sapiens keratin 7 (KRT7), mRNA [NM_005556]                                                                                        | 205747.9875 | 108527.3875 | 0.527477274 | -3.221719312 |
| DSC2       | Homo sapiens desmocollin 2 (DSC2), transcript variant Dsc2a, mRNA [NM_024422]                                                          | 147.7242    | 724.674875  | 4.905593498 | 2.406117503  |
| RGS2       | Homo sapiens regulator of G-protein signaling 2, 24kDa (RGS2), mRNA [NM_002923]                                                        | 308.1948151 | 1625.207484 | 5.273312218 | 3.688176772  |
| WNT11      | Homo sapiens wingless-type MMTV integration site family, member 11 (WNT11), mRNA [NM_004626]                                           | 71.56063    | 396.12025   | 5.53544945  | 2.589904223  |
| PDGFRB     | Homo sapiens platelet-derived growth factor receptor, beta polypeptide (PDGFRB), mRNA [NM_002609]                                      | 3.724214625 | 35.3407475  | 9.489449739 | 2.069150579  |
